# Supplementary material for: Daily Rhythms in the IGF-1 System in the Liver of Goldfish and Their Synchronization to Light/Dark Cycle and Feeding Time
Source: MDPI journal article supplement (doi:10.3390/ani12233371), 2022-11-30
Supplement: s1 [file s1]

| Gene             | Access number<br>(GenBank) | Primer sequences (5'→3') |                          | Product (bp) |
|------------------|----------------------------|--------------------------|--------------------------|--------------|
| <i>ef-1α</i>     | AB056104.1                 | F                        | CCCTGGCCACAGAGATTTCA     | 101          |
|                  |                            | R                        | CAGCCTCGAACTCACCAACA     |              |
| <i>igf-1</i>     | AF001006.1                 | F                        | CAGGGGCATTGGTGTGA        | 153          |
|                  |                            | R                        | GCAGCGTGTCTACAAGC        |              |
| <i>igf1ra</i>    | AF216773.2                 | F                        | GCGTGTAACCACGAGATCCA     | 132          |
|                  |                            | R                        | GCACTGTTTCCTTCTCCCCTC    |              |
| <i>igf1rb</i>    | AF216772.2                 | F                        | CCCTTCACCGTTTACCGCAT     | 155          |
|                  |                            | R                        | GAACACAGAACCCTCCAGATGT   |              |
| <i>igfbp1a-a</i> | XP_026089341.1             | F                        | ACAACACGCCAGATCACTCC     | 183          |
|                  |                            | R                        | TATGACAAGGACCCTGCTCC     |              |
| <i>igfbp1a-b</i> | XP_026147113.1             | F                        | AACACGCCAGATCAGCCG       | 184          |
|                  |                            | R                        | TCAATATGACAAGGACCCTGTTGT |              |
| <i>igfbp1b-a</i> | XP_026052969.1             | F                        | ACGCCGTCTGTGTAGAGTTT     | 217          |
|                  |                            | R                        | ATGACGTCCAGAGCTGCGT      |              |
| <i>igfbp1b-b</i> | XP_026062900.1             | F                        | CCGTCTGCACCGAGGAC        | 218          |
|                  |                            | R                        | AGTGATCAGATTCAGAGACGCTC  |              |
| <i>igfbp2a-a</i> | XP_026070558.1             | F                        | TGGTGAATGCTGGTGTGTGG     | 113          |
|                  |                            | R                        | AGGGATCCATCTCTAGGGCA     |              |
| <i>igfbp2a-b</i> | XP_026118614.1             | F                        | GAGGACCCTAAAGCACCGC      | 237          |
|                  |                            | R                        | GGGTCTTCCTGTGTGTGGATTA   |              |
| <i>igfbp2b-a</i> | XP_026073308.1             | F                        | GCGTGTCCTCAAGCTCACC      | 159          |
|                  |                            | R                        | CGGTAACCTCTGAATTGGCGCTT  |              |
| <i>igfbp2b-b</i> | XP_026127022.1             | F                        | GGCGTGTCCTCAAGCTCATA     | 160          |
|                  |                            | R                        | CTGTAACCTCTGAATTCGCGGTC  |              |

F: Forward, R: Reverse
